# Supplementary material
Source: publisher site journal article supplement (https://www.dovepress.com/article/541147)
Supplement: Supplementary file 1 [file 541147%20Revised%20supplementary.doc]

| **Instruction** |
| --- |
| **●**  A full description of CFIR constructs can be found at www.cfirguide.org |
| **●**  A full description of the ERIC implementation strategy compilation can be found at https://doi.org/10.1186/s13012-015-0209-1 |
| **●**  CFIR constructs were framed as barriers for the purpose of this work. This Tool is provided based on endorsements from respondents who selected and ranked "up to 7 strategies that would best address" each CFIR barrier. |
| **How to read the following tables:** |
| The "Summary" tables the results of the rank task where ERIC strategies are considered endorsed if they were ranked by a panelist for a specific CFIR-related barrier. Percentages reflect the proportion of panelists endorsing a strategy as being a "top seven" strategy for that barrier. |

**Supplementary Table1 Summary of number of votes for CFIR related barriers and ERIC strategies**

| ***CFIR Related Barrier*** | Intervention characteristics | | Outer setting | Inner setting | | | Characteristics of individuals | | Process | | |  |
| --- | --- | --- | --- | --- | --- | --- | --- | --- | --- | --- | --- | --- |
| Adaptability | Trialability | students Needs & Resources | Learning Climate:learning-centered | Available Resources（role model-male nurses） | Access to knowledge and information | Self-efficacy | Individual Identification with Organization:professional identification | Key Stakeholders: teachers | Students | Reflecting & Evaluating | Total votes |
| **2.2.2 Teachers-focus group** | | | | | | | | | | | | |
| Number of voters (n=5) | 2 | 1 | 2 | 2 | 5 | 3 | 2 | 3 | 1 | 1 | 2 | 24 |
| ***ERIC STRATEGIES*** | | | | | | | | | | | | |
| ***2.2.3* Expert workshop** | | | | | | | | | | | | |
| Participants | 22 | 15 | 23 | 21 | 25 | 25 | 23 | 24 | 13 | 14 | 19 | 224 |
| Alter incentive/scholarship structures |  |  |  |  |  |  |  | 2 |  |  |  | 2 |
| Alter leaning material fees |  |  |  |  |  |  |  |  |  |  |  | 0 |
| Assess for readiness and identify barriers and facilitators | 10 |  |  | 6 | 3 | 5 | 6 |  | 5 |  | 5 | 40 |
| Audit and provide feedback |  |  |  |  |  | 7 |  |  | 6 |  | 7 | 20 |
| Build a coalition |  | 5 |  |  |  |  |  | 12 | 5 |  |  | 22 |
| Capture and share local knowledge | 10 |  |  | 9 | 19 | 22 | 2 | 10 |  |  | 2 | 74 |
| Centralize technical assistance |  | 6 |  |  |  | 9 |  |  |  |  |  | 15 |
| Change accreditation or membership reqs |  |  |  |  |  |  |  |  |  |  |  | 0 |
| Change liability rules |  |  |  |  |  |  |  |  |  |  |  | 0 |
| Change physical structure and equipment | 5 |  |  |  |  |  |  |  |  |  |  | 5 |
| Change record system |  |  |  |  |  |  |  |  |  |  |  | 0 |
| Change service sites |  |  |  |  |  |  |  |  |  |  |  | 0 |
| Conduct cyclical small tests of change |  | 3 |  |  |  |  |  | 4 | 3 |  |  | 10 |
| Conduct educational meetings | 4 |  |  | 3 | 8 |  |  |  | 5 | 3 | 5 | 28 |
| Conduct educational outreach visits |  |  |  |  |  |  |  | 2 | 2 |  |  | 4 |
| Conduct local consensus discussions | 3 |  |  | 5 | 6 |  |  | 8 | 6 |  | 10 | 38 |
| Conduct local needs assessment |  | 5 | 13 |  |  |  | 12 |  | 5 | 7 |  | 42 |
| Conduct ongoing training |  |  |  | 13 |  |  |  |  | 1 |  |  | 14 |
| Create a learning collaborative |  | 6 | 9 | 11 | 13 | 19 | 7 | 16 | 5 |  | 3 | 89 |
| Create new teaching/learning teams |  |  |  |  |  |  |  |  |  |  |  | 0 |
| Create or change credentialing and/or licensure standards |  |  |  |  |  |  |  |  |  |  |  | 0 |
| Develop a formal implementation blueprint |  | 9 | 9 | 7 | 14 | 13 | 5 | 10 | 6 |  | 3 | 76 |
| Develop academic partnerships | 3 |  | 7 |  |  |  | 8 | 7 | 2 | 8 | 5 | 40 |
| Develop an implementation glossary |  | 5 | 2 |  |  | 1 |  | 8 |  |  |  | 16 |
| Develop and implement tools for quality monitoring | 4 | 6 |  |  |  |  |  |  | 2 |  | 8 | 20 |
| Develop and organize quality monitoring systems |  |  |  |  | 1 |  |  |  |  |  | 9 | 10 |
| Develop disincentives | 5 |  |  |  |  | 1 |  |  | 2 |  | 9 | 17 |
| Develop educational materials | 4 | 3 |  |  | 6 |  |  | 2 |  |  | 1 | 16 |
| Develop resource sharing agreements |  |  |  | 6 |  |  | 3 |  | 1 | 5 |  | 15 |
| Distribute educational materials | 2 | 3 |  |  |  | 2 |  |  |  | 3 |  | 10 |
| Facilitate relay of clinical data to learners |  |  |  |  |  |  |  |  |  |  |  | 0 |
| Facilitation |  |  |  |  |  |  | 9 | 7 | 9 | 7 | 8 | 40 |
| Fund and contract for teaching innovation |  |  |  |  |  |  |  |  |  |  |  | 0 |
| Identify and prepare champions |  |  |  | 2 |  |  |  | 10 |  |  |  | 12 |
| Identify early adopters |  | 5 | 8 |  | 1 |  |  |  | 3 |  | 1 | 18 |
| Increase demand |  | 3 | 7 |  | 2 |  |  |  |  |  |  | 12 |
| Inform students leaders |  |  |  |  | 1 | 7 |  |  |  |  | 4 | 12 |
| Intervene with students to enhance uptake & adherence |  | 6 |  |  |  |  |  | 10 |  | 12 |  | 28 |
| Involve executive boards |  | 3 |  |  |  |  |  |  | 3 |  | 9 | 15 |
| Involve students' family members |  |  |  |  |  |  |  |  |  |  |  | 0 |
| Make examination easier |  |  |  |  |  |  |  |  |  |  |  | 0 |
| Make training dynamic | 10 | 5 | 5 |  | 13 | 14 |  | 19 |  |  |  | 66 |
| Mandate change |  |  |  |  | 5 |  |  |  |  |  | 6 | 11 |
| Model and simulate change | 9 | 1 |  |  | 6 |  |  |  | 6 |  |  | 22 |
| Obtain and use students and teachers feedback |  |  |  |  | 2 |  | 9 | 2 |  | 10 | 1 | 24 |
| Obtain formal commitments | 7 |  |  |  | 4 |  |  |  |  |  |  | 11 |
| Organize clinician implementation team meetings |  |  |  | 5 |  |  | 1 |  |  |  |  | 6 |
| Place innovation on teaching materials for service lists/formularies |  |  |  |  |  |  |  |  |  |  |  | 0 |
| Prepare students to be active participants | 9 | 5 | 6 |  | 14 | 16 |  | 15 |  | 9 |  | 74 |
| Promote adaptability | 5 | 5 |  |  |  |  | 5 |  |  |  |  | 15 |
| Promote network weaving |  |  |  |  | 1 |  |  | 1 |  |  |  | 2 |
| Provide clinical supervision | 1 |  |  |  |  |  |  |  |  |  | 1 | 2 |
| Provide local technical assistance |  |  |  |  | 1 | 7 |  | 1 | 3 |  |  | 12 |
| Provide ongoing consultation |  | 3 |  |  | 6 |  |  |  | 2 |  | 1 | 12 |
| Purposely reexamine the implementation | 2 |  |  |  |  |  | 5 | 3 | 5 |  |  | 15 |
| Recruit, designate and train for leadership | 1 |  |  |  | 4 | 5 |  |  |  | 6 |  | 16 |
| Remind teachers |  |  |  |  |  |  |  |  |  |  |  | 0 |
| Revise professional roles |  |  |  |  | 3 |  |  |  |  |  |  | 3 |
| Shadow other experts |  | 5 |  |  | 14 | 14 |  | 15 |  |  |  | 48 |
| Stage implementation scale up |  |  |  |  |  |  |  |  |  |  | 1 | 1 |
| Start a dissemination organization | 1 |  |  |  |  |  |  |  |  |  |  | 1 |
| Tailor strategies |  | 7 |  |  | 17 | 14 |  | 12 |  |  |  | 50 |
| Use advisory boards and workgroups |  |  |  |  | 3 |  |  |  |  |  |  | 3 |
| Use an implementation adviser | 1 |  |  | 2 |  |  |  |  | 3 | 4 | 3 | 13 |
| Use individual advise |  |  |  |  |  |  |  |  |  |  |  | 0 |
| Use data experts | 1 |  |  |  | 2 |  |  |  |  |  | 5 | 8 |
| Use data warehousing techniques |  |  |  |  |  | 5 |  |  |  |  |  | 5 |
| Use mass media |  | 1 |  |  |  | 6 |  |  |  |  |  | 7 |
| Use other digital materials |  |  |  |  |  |  |  |  |  |  |  | 0 |
| Use train the trainer strategies |  | 1 |  |  | 1 | 5 |  |  | 3 | 5 |  | 15 |
| Visit other sites | 1 |  |  |  | 3 |  |  |  |  |  | 3 | 7 |
| Work with educational institutions | 1 | 1 |  |  | 2 |  | 1 |  | 8 | 1 |  | 14 |
| Access new funding |  |  |  |  |  |  |  |  |  |  |  | 0 |
| Total | 99 | 102 | 66 | 69 | 175 | 172 | 73 | 176 | 101 | 80 | 110 | 1223 |

**Supplementary table 2 Summary of results for CFIR related barriers and ERIC strategies**

| **CFIR chanllenging factors** | Intervention characteristics | | Outer setting | Inner setting | | | Characteristics of individuals | | Process | | | total | Count of Level 1 Strategies | Count of Level 2 Strategies |
| --- | --- | --- | --- | --- | --- | --- | --- | --- | --- | --- | --- | --- | --- | --- |
| **ERIC strategies** | Adaptability | Trialability | students Needs & Resources | Learning Climate: learning-centered | Available Resources (role model-male nurses) | Access to knowledge and information | Self-efficacy | Individual Identification with Organization: professional identification | Key Stakeholders: teachers | Students | Reflecting & Evaluating |
| **2.2.2 Teachers-focus group** | | | | | | | | | | | | |
| Number of voters (n=5) | 2 | 1 | 2 | 2 | 5 | 3 | 2 | 3 | 1 | 1 | 2 | 24 |
| **2.2.3 Expert workshop** | | | | | | | | | | | | |
| Participants | 22 | 15 | 23 | 21 | 25 | 25 | 23 | 24 | 13 | 14 | 19 | 224 |
| Alter incentive/scholarship structures | 0% | 0% | 0% | 0% | 0% | 0% | 0% | 8% | 0% | 0% | 0% | 1% | 0 | 0 |
| Alter leaning material fees | 0% | 0% | 0% | 0% | 0% | 0% | 0% | 0% | 0% | 0% | 0% | 0% | 0 | 0 |
| Assess for readiness and identify barriers and facilitators | 45% | 0% | 0% | 29% | 12% | 20% | 26% | 0% | 38% | 0% | 26% | 18% | 0 | 6 |
| Audit and provide feedback | 0% | 0% | 0% | 0% | 0% | 28% | 0% | 0% | 46% | 0% | 37% | 9% | 0 | 3 |
| Build a coalition | 0% | 33% | 0% | 0% | 0% | 0% | 0% | 50% | 38% | 0% | 0% | 10% | 1 | 2 |
| Capture and share local knowledge | 45% | 0% | 0% | 43% | 76% | 88% | 9% | 42% | 0% | 0% | 11% | 33% | 2 | 3 |
| Centralize technical assistance | 0% | 40% | 0% | 0% | 0% | 36% | 0% | 0% | 0% | 0% | 0% | 7% | 0 | 2 |
| Change accreditation or membership reqs | 0% | 0% | 0% | 0% | 0% | 0% | 0% | 0% | 0% | 0% | 0% | 0% | 0 | 0 |
| Change liability rules | 0% | 0% | 0% | 0% | 0% | 0% | 0% | 0% | 0% | 0% | 0% | 0% | 0 | 0 |
| Change physical structure and equipment | 23% | 0% | 0% | 0% | 0% | 0% | 0% | 0% | 0% | 0% | 0% | 2% | 0 | 1 |
| Change record system | 0% | 0% | 0% | 0% | 0% | 0% | 0% | 0% | 0% | 0% | 0% | 0% | 0 | 0 |
| Change service sites | 0% | 0% | 0% | 0% | 0% | 0% | 0% | 0% | 0% | 0% | 0% | 0% | 0 | 0 |
| Conduct cyclical small tests of change | 0% | 20% | 0% | 0% | 0% | 0% | 0% | 17% | 23% | 0% | 0% | 4% | 0 | 2 |
| Conduct educational meetings | 18% | 0% | 0% | 14% | 32% | 0% | 0% | 0% | 38% | 21% | 26% | 13% | 0 | 4 |
| Conduct educational outreach visits | 0% | 0% | 0% | 0% | 0% | 0% | 0% | 8% | 15% | 0% | 0% | 2% | 0 | 0 |
| Conduct local consensus discussions | 14% | 0% | 0% | 24% | 24% | 0% | 0% | 33% | 46% | 0% | 53% | 17% | 1 | 4 |
| Conduct local needs assessment | 0% | 33% | 57% | 0% | 0% | 0% | 52% | 0% | 38% | 50% | 0% | 19% | 3 | 2 |
| Conduct ongoing training | 0% | 0% | 0% | 62% | 0% | 0% | 0% | 0% | 8% | 0% | 0% | 6% | 1 | 0 |
| Create a learning collaborative | 0% | 40% | 39% | 52% | 52% | 76% | 30% | 67% | 38% | 0% | 16% | 40% | 4 | 4 |
| Create new teaching/learning teams | 0% | 0% | 0% | 0% | 0% | 0% | 0% | 0% | 0% | 0% | 0% | 0% | 0 | 0 |
| Create or change credentialing and/or licensure standards | 0% | 0% | 0% | 0% | 0% | 0% | 0% | 0% | 0% | 0% | 0% | 0% | 0 | 0 |
| Develop a formal implementation blueprint | 0% | 60% | 39% | 33% | 56% | 52% | 22% | 42% | 46% | 0% | 16% | 34% | 3 | 5 |
| Develop academic partnerships | 14% | 0% | 30% | 0% | 0% | 0% | 35% | 29% | 15% | 57% | 26% | 18% | 1 | 4 |
| Develop an implementation glossary | 0% | 33% | 9% | 0% | 0% | 4% | 0% | 33% | 0% | 0% | 0% | 7% | 0 | 2 |
| Develop and implement tools for quality monitoring | 18% | 40% | 0% | 0% | 0% | 0% | 0% | 0% | 15% | 0% | 42% | 9% | 0 | 2 |
| Develop and organize quality monitoring systems | 0% | 0% | 0% | 0% | 4% | 0% | 0% | 0% | 0% | 0% | 47% | 4% | 0 | 1 |
| Develop disincentives | 23% | 0% | 0% | 0% | 0% | 4% | 0% | 0% | 15% | 0% | 47% | 8% | 0 | 2 |
| Develop educational materials | 18% | 20% | 0% | 0% | 24% | 0% | 0% | 8% | 0% | 0% | 5% | 7% | 0 | 2 |
| Develop resource sharing agreements | 0% | 0% | 0% | 29% | 0% | 0% | 13% | 0% | 8% | 36% | 0% | 7% | 0 | 2 |
| Distribute educational materials | 9% | 20% | 0% | 0% | 0% | 8% | 0% | 0% | 0% | 21% | 0% | 4% | 0 | 2 |
| Facilitate relay of clinical data to learners | 0% | 0% | 0% | 0% | 0% | 0% | 0% | 0% | 0% | 0% | 0% | 0% | 0 | 0 |
| Facilitation | 0% | 0% | 0% | 0% | 0% | 0% | 39% | 29% | 69% | 50% | 42% | 18% | 2 | 3 |
| Fund and contract for teaching innovation | 0% | 0% | 0% | 0% | 0% | 0% | 0% | 0% | 0% | 0% | 0% | 0% | 0 | 0 |
| Identify and prepare champions | 0% | 0% | 0% | 10% | 0% | 0% | 0% | 42% | 0% | 0% | 0% | 5% | 0 | 1 |
| Identify early adopters | 0% | 33% | 35% | 0% | 4% | 0% | 0% | 0% | 23% | 0% | 5% | 8% | 0 | 3 |
| Increase demand | 0% | 20% | 30% | 0% | 8% | 0% | 0% | 0% | 0% | 0% | 0% | 5% | 0 | 2 |
| Inform students leaders | 0% | 0% | 0% | 0% | 4% | 28% | 0% | 0% | 0% | 0% | 21% | 5% | 0 | 2 |
| Intervene with students to enhance uptake & adherence | 0% | 40% | 0% | 0% | 0% | 0% | 0% | 42% | 0% | 86% | 0% | 13% | 1 | 2 |
| Involve executive boards | 0% | 20% | 0% | 0% | 0% | 0% | 0% | 0% | 23% | 0% | 47% | 7% | 0 | 3 |
| Involve students' family members | 0% | 0% | 0% | 0% | 0% | 0% | 0% | 0% | 0% | 0% | 0% | 0% | 0 | 0 |
| Make examination easier | 0% | 0% | 0% | 0% | 0% | 0% | 0% | 0% | 0% | 0% | 0% | 0% | 0 | 0 |
| Make training dynamic | 45% | 33% | 22% | 0% | 52% | 56% | 0% | 79% | 0% | 0% | 0% | 29% | 3 | 3 |
| Mandate change | 0% | 0% | 0% | 0% | 20% | 0% | 0% | 0% | 0% | 0% | 32% | 5% | 0 | 2 |
| Model and simulate change | 41% | 7% | 0% | 0% | 24% | 0% | 0% | 0% | 46% | 0% | 0% | 10% | 0 | 3 |
| Obtain and use students and teachers feedback | 0% | 0% | 0% | 0% | 8% | 0% | 39% | 8% | 0% | 71% | 5% | 11% | 1 | 1 |
| Obtain formal commitments | 32% | 0% | 0% | 0% | 16% | 0% | 0% | 0% | 0% | 0% | 0% | 5% | 0 | 1 |
| Organize clinician implementation team meetings | 0% | 0% | 0% | 24% | 0% | 0% | 4% | 0% | 0% | 0% | 0% | 3% | 0 | 1 |
| Place innovation on teaching materials for service lists/formularies | 0% | 0% | 0% | 0% | 0% | 0% | 0% | 0% | 0% | 0% | 0% | 0% | 0 | 0 |
| Prepare students to be active participants | 41% | 33% | 26% | 0% | 56% | 64% | 0% | 63% | 0% | 64% | 0% | 33% | 4 | 3 |
| Promote adaptability | 23% | 33% | 0% | 0% | 0% | 0% | 22% | 0% | 0% | 0% | 0% | 7% | 0 | 3 |
| Promote network weaving | 0% | 0% | 0% | 0% | 4% | 0% | 0% | 4% | 0% | 0% | 0% | 1% | 0 | 0 |
| Provide clinical supervision | 5% | 0% | 0% | 0% | 0% | 0% | 0% | 0% | 0% | 0% | 5% | 1% | 0 | 0 |
| Provide local technical assistance | 0% | 0% | 0% | 0% | 4% | 28% | 0% | 4% | 23% | 0% | 0% | 5% | 0 | 2 |
| Provide ongoing consultation | 0% | 20% | 0% | 0% | 24% | 0% | 0% | 0% | 15% | 0% | 5% | 5% | 0 | 2 |
| Purposely reexamine the implementation | 9% | 0% | 0% | 0% | 0% | 0% | 22% | 13% | 38% | 0% | 0% | 7% | 0 | 2 |
| Recruit, designate and train for leadership | 5% | 0% | 0% | 0% | 16% | 20% | 0% | 0% | 0% | 43% | 0% | 7% | 0 | 2 |
| Remind teachers | 0% | 0% | 0% | 0% | 0% | 0% | 0% | 0% | 0% | 0% | 0% | 0% | 0 | 0 |
| Revise professional roles | 0% | 0% | 0% | 0% | 12% | 0% | 0% | 0% | 0% | 0% | 0% | 1% | 0 | 0 |
| Shadow other experts | 0% | 33% | 0% | 0% | 56% | 56% | 0% | 63% | 0% | 0% | 0% | 21% | 3 | 1 |
| Stage implementation scale up | 0% | 0% | 0% | 0% | 0% | 0% | 0% | 0% | 0% | 0% | 5% | 0% | 0 | 0 |
| Start a dissemination organization | 5% | 0% | 0% | 0% | 0% | 0% | 0% | 0% | 0% | 0% | 0% | 0% | 0 | 0 |
| Tailor strategies | 0% | 47% | 0% | 0% | 68% | 56% | 0% | 50% | 0% | 0% | 0% | 22% | 3 | 1 |
| Use advisory boards and workgroups | 0% | 0% | 0% | 0% | 12% | 0% | 0% | 0% | 0% | 0% | 0% | 1% | 0 | 0 |
| Use an implementation adviser | 5% | 0% | 0% | 10% | 0% | 0% | 0% | 0% | 23% | 29% | 16% | 6% | 0 | 2 |
| Use individual advise | 0% | 0% | 0% | 0% | 0% | 0% | 0% | 0% | 0% | 0% | 0% | 0% | 0 | 0 |
| Use data experts | 5% | 0% | 0% | 0% | 8% | 0% | 0% | 0% | 0% | 0% | 26% | 4% | 0 | 1 |
| Use data warehousing techniques | 0% | 0% | 0% | 0% | 0% | 20% | 0% | 0% | 0% | 0% | 0% | 2% | 0 | 1 |
| Use mass media | 0% | 7% | 0% | 0% | 0% | 24% | 0% | 0% | 0% | 0% | 0% | 3% | 0 | 1 |
| Use other digital materials | 0% | 0% | 0% | 0% | 0% | 0% | 0% | 0% | 0% | 0% | 0% | 0% | 0 | 0 |
| Use train the trainer strategies | 0% | 7% | 0% | 0% | 4% | 20% | 0% | 0% | 23% | 36% | 0% | 7% | 0 | 3 |
| Visit other sites | 5% | 0% | 0% | 0% | 12% | 0% | 0% | 0% | 0% | 0% | 16% | 3% | 0 | 0 |
| Work with educational institutions | 5% | 7% | 0% | 0% | 8% | 0% | 4% | 0% | 62% | 7% | 0% | 6% | 1 | 0 |
| Access new funding | 0% | 0% | 0% | 0% | 0% | 0% | 0% | 0% | 0% | 0% | 0% | 0% | 0 | 0 |
| Total | | | | | | | | | | | | | 34 | 106 |
| ***Min/Max counts of ERIC strategies per CFIR-based barrier*** | | | | | | | | | | | | | ***Min*** | ***Max*** |
| Level 1 | 0 | 1 | 1 | 2 | 7 | 7 | 1 | 6 | 2 | 6 | 1 | 34 | 0 | 7 |
| Level 2 | 9 | 19 | 7 | 6 | 6 | 9 | 8 | 8 | 16 | 6 | 12 | 106 | 0 | 19 |
